# Supplementary material for: A Bottom-Up Methodology for Identifying Key Performance Indicators for Sustainability Monitoring of Unit Manufacturing Processes
Source: MDPI journal article supplement (doi:10.3390/su16020806), 2024-01-17
Supplement: s1 [file s1]

Archive with 2 entries (2 files):
- Supplementary Material (S1).xlsm
- Supplementary Material (S2).pdf
