# Supplementary material for: A Bottom-Up Methodology for Identifying Key Performance Indicators for Sustainability Monitoring of Unit Manufacturing Processes
Source: MDPI journal article supplement (doi:10.3390/su16020806), 2024-01-17
Supplement: s1 [file s1 › Supplementary Material (S1).xlsm]

## Sheet: Metadata
	BOTTOM-UP INDICATORS FOR SUSTAINABILITY MONI- TORING OF UNIT MANUFACTURING PROCESSES
	Supplementary material
	Marija Glisic1,2, Badrinath Veluri2, Devarajan Ramanujan1*,
	[1] Department of Mechanical & Production Engineering, Aarhus University, Inge Lehmanns Gade 10, Aarhus 8000, Denmark
	[2] Grundfos A/S, Poul Due Jensens Vej 7, Bjerringbro 8850, Denmark
	*Corresponding author
	E-mail: devr@mpe.au.dk
	This Excel document can apply the SMARTH worksheet in practice by allowing users to assess individual parameters' Sensitivity, Measurability, Actionability, Reliability, Timeliness and Human-centricity
	This document is composed of the following worksheets:
	Worksheet			Purpose
	Read me			Gives detailed instructions on how to apply the SMARTH worksheet to any industrial process.
	Measurability and Reliability assessment			Provides a template that the user needs to fill out and complete in order to assess the individual parameter based on Measurability, Reliability, Actionability, Timeliness and Human-centricity assessment.
	Criteria			Shows all the Measurability and Reliability criteria. Each criterion was classified into five progressive levels based on the severity of the influence. Thus, a level signifies the fulfillment of each criterion, going from level one, where all the requirements are met, to five, where none of the requirements is met. Furthermore, it shows Actionability, Timeliness and Human-centricity criteria and…
	Proceed to the Read Me worksheet for further instructions on how to perform the Measurability, Reliability, Actionability, Timeliness and Human-centricity assessment of the selected process parameters.

## Sheet: Read Me
SMARTH Worksheet Instruction
The "SMARTH_assessment" sheet is the questionnaire based on the developed criteria, shown in the "Criteria" sheet in this document. The purpose of this instruction is to help users perform the difficulty and variability assessment of the process parameters.
Note: Please assess all the process parameters and complete the template as much as possible.
Step 1:
A user needs to follow the methodological steps shown in the figure before to identify all the parameters generated from step 3. Therefore, it is mandatory to create a separate MR_assessment sheet for each process parameter.
Example:
The output of the step 3 are the following parameters:
Step 2:
To evaluate each process parameter from the equation above, please create a separate sheet by doing -copy and -paste of MR-assessment worksheet and name it according to the evaluated parameter. See below.
Subsequently, the user can start with assessment of the first individual parameter.
Step 3:
MR_assessment sheet consists of Measurability and Reliability assessment.
Measurability and Reliability are defined by a set of criteria.
Each criteria has a set of questions, that can be answered with "Yes", "No" or "N/A - Not applicable". Combination of the responses will automatically generate a score according to the level of criteria severity.
Example:
Notes: It is the user's responsibility to asure that the level description of the evaluated parameter resamble the actual scenario of the assessed parameter. In a case of a wrong assessment, the user can click on the reset button, that will delete all the prior answers of the assessed criterion, so the parameter can be assessed again.
Step 4:
After the assessment of the first individual parameter, please repeat the process for the rest of the parameters.
Step 5:
Perform sensitivity analysis for all the process parameters generated from step 3 and fill out the table in "Overall SMARTH scores" sheet.
Step 6:
Generate the table with the overall Measurability and Reliability scores for all of the assessed parameters according to equations (2) and (4), respectively and fill out the table in "Overall SMARTH scores" sheet.
Step 7:
To evaluate each process parameter based on ATH_assessment, please create a separate sheet by doing -copy and -paste of ATH-assessment worksheet and name it according to the evaluated parameter, as shown in Step 2.
ATH_assessment sheet consists of Actionability, Timeliness and Human-centricity assessment.
Actionability, Timeliness and Human-centricity assessment are defined by a set of criteria.
Each criteria has a set of questions, that can be answered with "Yes" or "No".
Combination of the responses will automatically generate a score according to the 3-point Likert scale.
The overall score for each Actionability, Timeliness and Human-centricity assessment is estimated based on the following equations:
Step 8:
Generate the table with the overall Actionability, Timeliness and Human-centricity scores for all of the assessed parameters according to equations (3) (5), and (6), respectively and fill out the table in the "Overall SMARTH scores" sheet.
Step 9:
Rename the Excel document according to the name of the process that SMARTH assessment has been applied to and save the Excel file.

## Sheet: Sensitivity
Variable	Sensitivity
	Nominal value		Variation %	Results
Z1
X1
X2
Y1

## Sheet: MR_assessment
	Criteria	Question	Yes/No/(N/A)	Level					Level description	Reset question
				L1	L2	L3	L4	L5
Measurability	Digitalization	Does the process have data acquisition system?
	Data granularity	Is it possible to measure the evaluated parameter at any level of granularity?
	Complexity of the process architecture	Is the process architecture designed to enable direct measurement of the process parameter?
	Impact of data collection on the process	Is it possible to performe measuring process?
	Operator / technician knowledge	Is it possible to access operator or production line?
Reliability	Standard operating procedure (SOP)	Is there existing SOP that completely describes operations relevant for the estimated parameter?
	Variability of the process setup	Do changes in the process parameters or the production process for producing another part within the same part family impact measurement of the evaluated parameter?
	Variability of the environmental conditions	Do production occur in controlled environmental conditions that do not have any impact on the evaluated parameter?
	Reliability of the measurement	Is it possible to accurately measure the evaluated parameter on the production line?

## Sheet: ATH_assessment
	Criteria		Question	Yes/No	Score	Overall Score - A
ACTIONABILITY	C1A	Controllability of the process parameter during the production process.	Is the evaluated process parameter controllable?			0
	C2A	Degree to which the process parameter can be controlled (affected) in the product/process planning stage.	Can the evaluated parameter be affected in the product/process planning stage?
	C3A	Feasibility of implementing the action the relevant controls.	Is there an action that can be performed to enable the relevant controls?
	Criteria		Question	Yes/No	Score	Overall Score - T
TIMELINESS	C1T	Data collection and analysis for the process parameter can be conducted at a rate that is meaningful for product/process planning.	Is the evaluated process parameter accessible for data collection and analysis?			0
	C2T	Data can be archived in systems that are accessible during product/process planning.	Can data be archived in existing systems?
	Criteria		Question	Yes/No	Score	Overall Score - H
HUMAN-CENTRICITY	C1H	Do all relevant stakeholders have common understanding of the process parameter?	Are all relevant stakeholders involved in the evaluation of the process parameter?			0
	C2H	Do relevant stakeholders understand how the change in the process parameter influences the process performance?	Are stakeholders aware that evaluated process parameter can be changed?
	C3H	Do relevant stakeholders have an understanding of how changes to the process parameters affect the sustainability aspects of the process performance?	Are relevant stakeholders aware that the evaluated process parameter influences the sustainability performance of the process?
	C4H	Do relevant stakeholders have the necessary skills to control the process parameter?	Are relevant stakeholders aware that the evaluated process parameter can be controlled?

## Sheet: List
-1		No
0		Yes
1

## Sheet: Overall SMARTH scores
Variable	Sensitivity
	Score
Z1
X1
X2
Y1
Variable	Measurability
	C1D	C2D	C3D	C4D	C5D
Z1
X1
X2
Y1
Variable	Reliability
	C1V	C2V	C3V	C4V	/
Z1
X1
X2
Y1
Variable	Actionability
	C1A	C2A	C3A	/	/
Z1
X1
X2
Y1
Variable	Timeliness
	C1T	C2T	/	/	/
Z1
X1
X2
Y1
Variable	Human-Centricity
	C1H	C2H	C3H	C4H	/
Z1
X1
X2
Y1

## Sheet: Criteria
	Criteria	Measurability level
		1		2	3		4	5
Measurability	Digitalization	Process has a data acquisition system with direct access to the evaluated parameter.		Process has a data acquisition system; evaluated parameter can be estimated but not directly accessed from the system.	Process does not have a data acquisition system. Digital measurement equipment can be installed to enable direct access to the evaluated parameter.		Process does not have a data acquisition system. Digital measurement equipment can be installed; evaluated parameter can be estimated but not directly accessed from the equipment.	Process does not have a data acquisition system and it is not possible to install any additional equipment to estimate the evaluated parameter.
	Data granularity	Possible to measure the evaluated parameter at the highest granularity level, e.g., component / sub-system level.		Only possible to measure the evaluated parameter at intermediate granularity, e.g., machine level.	Only possible to measure the evaluated parameter at low granularity, e.g, production system level.		Only possible to measure the evaluated parameter at very poor granularity e.g., factory level.	Not possible to measure the evaluated parameter at any level of granularity.
	Complexity of the process architecture	The process architecture is designed & implemented to enable direct measurement of the evaluated parameter; measurement is simple & time/cost efficient.		The process architecture needs minor modifications in order to enable direct measurement of the evaluated parameter; modification is simple & time/cost efficient.	The process architecture enables indirect estimation of the evaluated parameter. Significant modifications are need to enable direct measurements.		The process architecture enables indirect estimation of the evaluated parameter. The process cannot be modified to enable direct data measurement.	The process architecture does not allow direct measurement or indirect estimation of the evaluated parameter; no process modification is possible.
	Impact of data collection on the process	Measurement process for the evaluated parameter can be performed during production, without creating any process disruptions.		Measurement process for the evaluated parameter disrupts production; disruptions are minor and can be ignored.	Measurement process for the evaluated parameter disrupts production; managing the disruptions require some process alterations.		Measurement process for the evaluated parameter is not possible on the production setup.	Measuring process cannot be performed.
	Operator / technician knowledge	Operators have in-depth knowledge of the production setup and experience with measurement of the evaluated parameter.		Operators have good knowledge of the production setup and some experience with measurement of the evaluated parameter.	Operators are familiar with a similar production setup in another line/factory. They have some experience with measurement of the evaluated parameter.		Operators have limited familiarity about the specific production setup and similar setups. They have no experience with measurement of the evaluated parameter.	Operator knowledge is inaccessible due to lack of access to the operator or production line.
		Reliability level
		1		2	3		4	5
Reliability	Standard operating procedure (SOP)	Sequence & procedure of operations relevant to the evaluated parameter is completely described in an SOP; operations are performed in a defined order using the exact methods and tools stated in the SOP.		Sequence & procedure for a majority of operations relevant to the evaluated parameter are described in an SOP; operations standardized in SOP are performed as defined while the rest are performed based on formal agreements between operators / engineers.	Sequence & procedure for some operations relevant to the evaluated parameter are described in an SOP; operations standardized in SOP are performed as defined while the rest are performed based on formal agreements between operators / engineers.		No operations relevant to the evaluated parameter are defined in an SOP. However, they are based on formal agreements between operators / engineers.	No operations relevant to the evaluated parameter are defined in an SOP. Operations are performed based on the judgement of individual operators.
	Variability of the process setup	Changes in the process parameters or the production process for producing another part within the same part family do not impact measurement of the evaluated parameter.		Changes in a process parameters or the production process for producing another part within the same part family have a known impact on measurements of the evaluated parameter; it is possible to control and monitor the impact.	Changes in a process parameters or the production process for producing another part within the same part family have a known impact on measurements of the evaluated parameter; impact can be monitored but not controlled.		Changes in a process setup or the production process for producing another part within the same part family have a known impact on measurements of the evaluated parameter; impact cannot be monitored or controlled.	Changes in a process setup or the production process for producing another part within the same part family have an unknown impact on measurements of the evaluated parameter; impacts are difficult to trace.
	Variability of the environmental conditions	Production occurs in controlled environmental conditions that do not have any impact on the evaluated parameter.		Production occurs in controlled environmental conditions that have a known impact on the evaluated parameter; the impact is monitored and controlled.	Production occurs in controlled environmental conditions that have a known impact on the evaluated parameter; the impact is monitored but not controlled.		Production occurs in uncontrolled environmental conditions that have a known impact on the evaluated parameter; impact is not monitored or controlled.	Production occurs in uncontrolled environmental conditions and their impact on the evaluated parameter is unknown and difficult to trace.
	Reliability of the measurement	The evaluated parameter can be accurately measured on the production line (or) reliable empirical data for the evaluated parameter is available for the specific production setup.		Measurement of the evaluated parameter from the specific production line requires assumptions or approximations based on reliable empirical evidence.	The evaluated parameter cannot be measured from the specific production line. However reliable empirical data is available for a generic production process.		It is only possible to measure the evaluated parameter based on qualified estimates from experts; no reliable empirical data is available.	No reliable estimates can be made for the evaluated parameter.
